## Perspective

# Mechanisms of active regulation of biomolecular condensates

Johannes Söding,<sup>1,\*</sup> David Zwicker,<sup>2</sup> Salma Sohrabi-Jahromi,<sup>1</sup> Marc Boehning,<sup>3</sup> Jan Kirschbaum<sup>2</sup>

<sup>1</sup> Quantitative Biology & Bioinformatics and <sup>3</sup> Department of Molecular Biology,

Max-Planck Institute for Biophysical Chemistry, Am Faßberg 11, 37077 Göttingen, Germany.

<sup>2</sup> Max-Planck Institute for Dynamics and Self-Organization, Am Faßberg 17, 37077 Göttingen, Germany.

\* Corresponding author; soeding@mpibpc.mpg.de

July 5, 2019

### Abstract

Liquid-liquid phase separation is a key organizational principle in eukaryotic cells, on par with intracellular membranes. It allows cells to concentrate specific proteins into condensates, increasing reaction rates and achieving switch-like regulation. However, it is unclear how cells trigger condensate formation or dissolution and regulate their sizes. We predict from first principles two mechanisms of active regulation by post-translational modifications such as phosphorylation: In enrichment-inhibition, the regulating modifying enzyme enriches in condensates and the modifications of proteins inhibit their interactions. Stress granules, Cajal bodies, P granules, splicing speckles, and synapsin condensates obey this model. In localization-induction, condensates form around an immobilized modifying enzyme, whose modifications strengthen protein interactions. Spatially targeted condensates formed during transmembrane signaling, microtubule assembly, and actin polymerization conform to this model. The two models make testable predictions that can guide studies into the many emerging roles of biomolecular condensates.

1 Eukaryotic cells contain numerous types of mem-  
2 braneless organelles, which contain between a few  
3 and thousands of protein and RNA species that are  
4 highly enriched in comparison to the surrounding nu-  
5 cleoplasm or cytoplasm. These biomolecular conden-  
6 sates are held together by weak, multivalent and highly  
7 collaborative interactions, often between intrinsically  
8 disordered regions of their constituent proteins (Banani  
9 et al., 2017; Shin and Brangwynne, 2017).

10 In contrast to membrane-bound organelles, cells can  
11 regulate the formation and size of condensates by post-  
12 translational modifications of one or a few key proteins,  
13 most prominently by phosphorylation. The modifica-  
14 tions usually lie within intrinsically disordered regions  
15 and modulate the strength of attractive interactions  
16 with other condensate components (Bah and Forman-  
17 Kay, 2016; Fung et al., 2018). Due to the highly coop-  
18 erative nature of phase transitions, small changes in  
19 interaction strengths can result in the formation or dis-  
20 solution of condensates, and this switch-like, dynamic  
21 nature makes them ideal for regulation.

22 For instance the nucleolus, Cajal bodies, splicing  
23 speckles, paraspeckles, and PML bodies in the nucleus  
24 and P-bodies in the cytoplasm have to be dissolved  
25 during mitosis and reformed afterwards to ensure a bal-  
26 anced distribution of their content to daughter cells (Rai  
27 et al., 2018; Dundr and Misteli, 2010). Stress granules  
28 form upon cellular stress and are dissolved when the  
29 stress ceases (Wippich et al., 2013).

30 Whereas these long-known, floating droplet or-

31 ganelles are large enough to be visible using simpler  
32 light microscopic techniques, in the past years liquid-  
33 liquid phase separation has been implicated in mul-  
34 tifarious processes in which – often sub-micrometer-  
35 sized – condensates are formed at particular sites in the  
36 cell: at sites of DNA repair foci (Altmeyer et al., 2015),  
37 Polycomb-mediated chromatin silencing (Tatavosian  
38 et al., 2019), transmembrane signalling (Banjade and  
39 Rosen, 2014; Case et al., 2019), microtubule forma-  
40 tion (So et al., 2019; Huang et al., 2018; Hernández-  
41 Vega et al., 2017; Jiang et al., 2015), actin polymerization  
42 (Weirich et al., 2017), endocytosis (Bergeron-Sandoval  
43 et al., 2017; Miao et al., 2018), transcription (Cho et al.,  
44 2018; Sabari et al., 2018; Chong et al., 2018; Boehning  
45 et al., 2018), at presynaptic active zones (Wu et al., 2019;  
46 Zeng et al., 2018), and for RNP transport (Formicola  
47 et al., 2019; Alami et al., 2014). Such localized conden-  
48 sates form upon a local stimulus to recruit the required  
49 set of proteins and are dissolved once the job is done.

50 Cells do not only need to regulate the formation and  
51 dissolution of each type of condensate. They also need  
52 to tightly regulate their size and with it their numbers,  
53 to allow many condensates to form in different loca-  
54 tions, for instance to activate genes at thousands of  
55 active promoters. Here, we propose two active mecha-  
56 nisms used by cells for these purposes.

### 57 Phase separation and condensate size behaviour

58 To keep the model simple, we consider only one type of  
59 condensate protein. In the dilute regime below the sat-

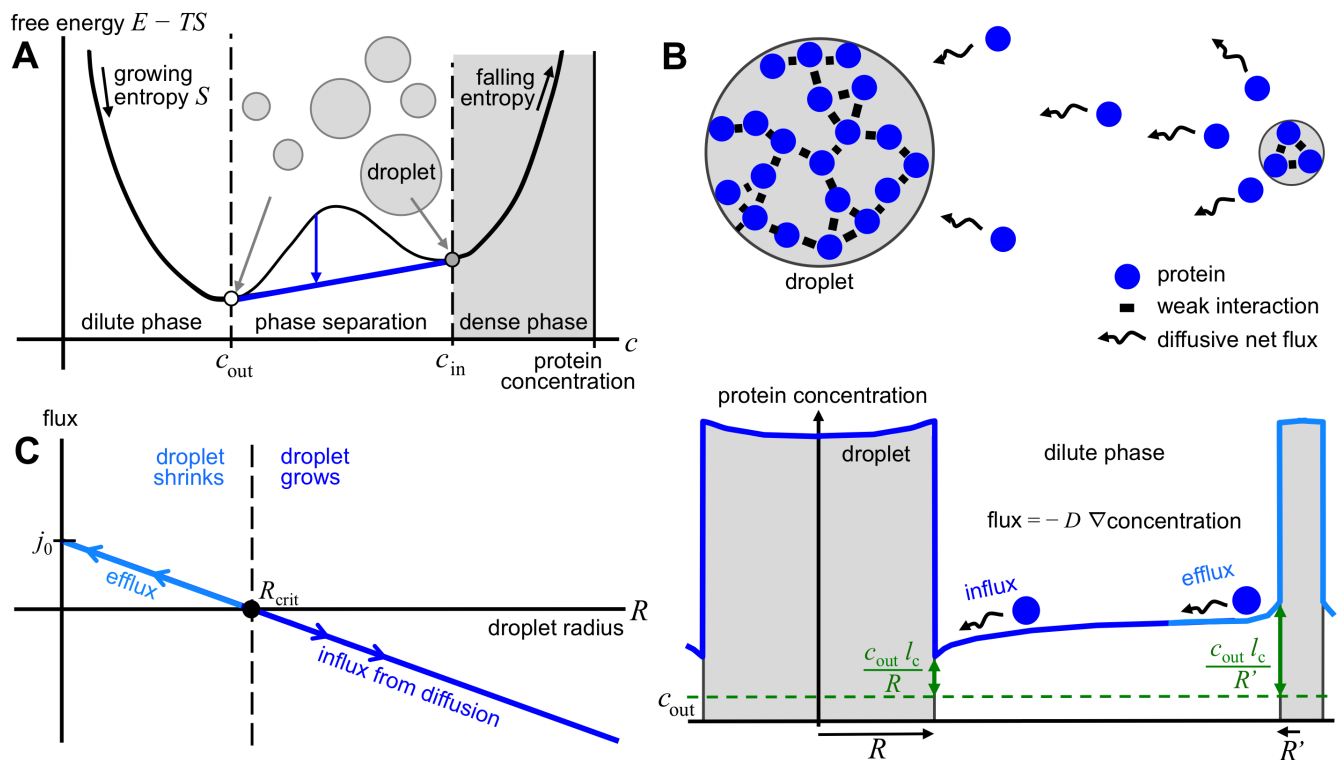

**Figure 1: Phase separation and condensate droplet size behaviour.** **A** When protein-protein and solvent-solvent interactions are more favorable than protein-solvent interactions, demixing into two phases can occur, a dilute phase with low protein concentration  $c_{out}$  and a dense phase with high concentration  $c_{in}$ . This happens when the sum of free energies of the two phases is lower (tip of blue arrow) than the energy of the single phase (base of blue arrow). **B**  $c_{out}$  is the limiting concentration for infinite condensate droplet radius  $R$ . The concentration on the outside of a condensate of radius  $R$  is larger the smaller the condensate is (green double-headed arrows), as it cannot hold on to its proteins as well as large ones. This leads to a concentration gradient ( $\nabla$ concentration), which fuels a diffusive flux from small to large condensates (wiggly arrows). ( $l_c$  is a measure of interaction strength between proteins in comparison to the solvent.) **C** As a result, condensates below a radius  $R_{crit}$  will shrink and larger ones will grow.

uration protein concentration  $c_{out}$ , condensate droplets cannot form (Figure 1A). Above  $c_{out}$ , in the phase separation regime, condensates can be stable.

However, in a passive system more than one condensate can not exist in equilibrium because larger condensates will grow at the expense of smaller ones (Figure 1B). To understand it, note that, in comparison to a large droplet, in a small droplet proteins on the surface have fewer favorable interactions with other droplet proteins due to its larger surface curvature. They are therefore more easily lost, resulting in a higher equilibrium concentration outside the droplet (For a quantitative derivation see Supplementary Material.) Due to this size dependence, the protein concentration decreases from small to large condensates, and the decrease generates a diffusive flux in the direction of steepest descent. Consequently, there exists a critical radius  $R_{crit}$  below which condensates will shrink while condensates above  $R_{crit}$  will grow (Figure 1C). The critical radius increases until a single large condensate survives, a phenomenon called coarsening (Hyman et al., 2014).

Here we show that, to actively regulate the formation and size of liquid droplet condensates, two generic mechanisms exist. An intracellular protein concentra-

tion maintained above saturation naturally leads to the enrichment-inhibition model, in which a droplet component-modifying enzyme such as a kinase inhibits favorable interactions and is enriched in condensates. A concentration maintained below saturation leads to the localization-induction model, in which the enzyme is localized or attached and induces favorable interactions. Although very simplified, these models probably capture the two essential mechanisms for regulating cellular condensates.

#### The enrichment-inhibition model

Above the saturation concentration, a mechanism must exist that limits the size of larger condensates to allow for the coexistence of multiple condensates. This can be achieved if the loss of proteins from the condensate increases faster with condensate radius  $R$  than the gain by net diffusive influx. The influx is proportional to  $R - R_{crit}$  (Figure 1C, see Supplementary Material for a derivation). A loss that scales with condensate volume  $(4\pi/3)R^3$  would grow faster than  $R - R_{crit}$ . Above a certain radius, the loss would surpass the influx, shrinking condensates that are too large and thereby

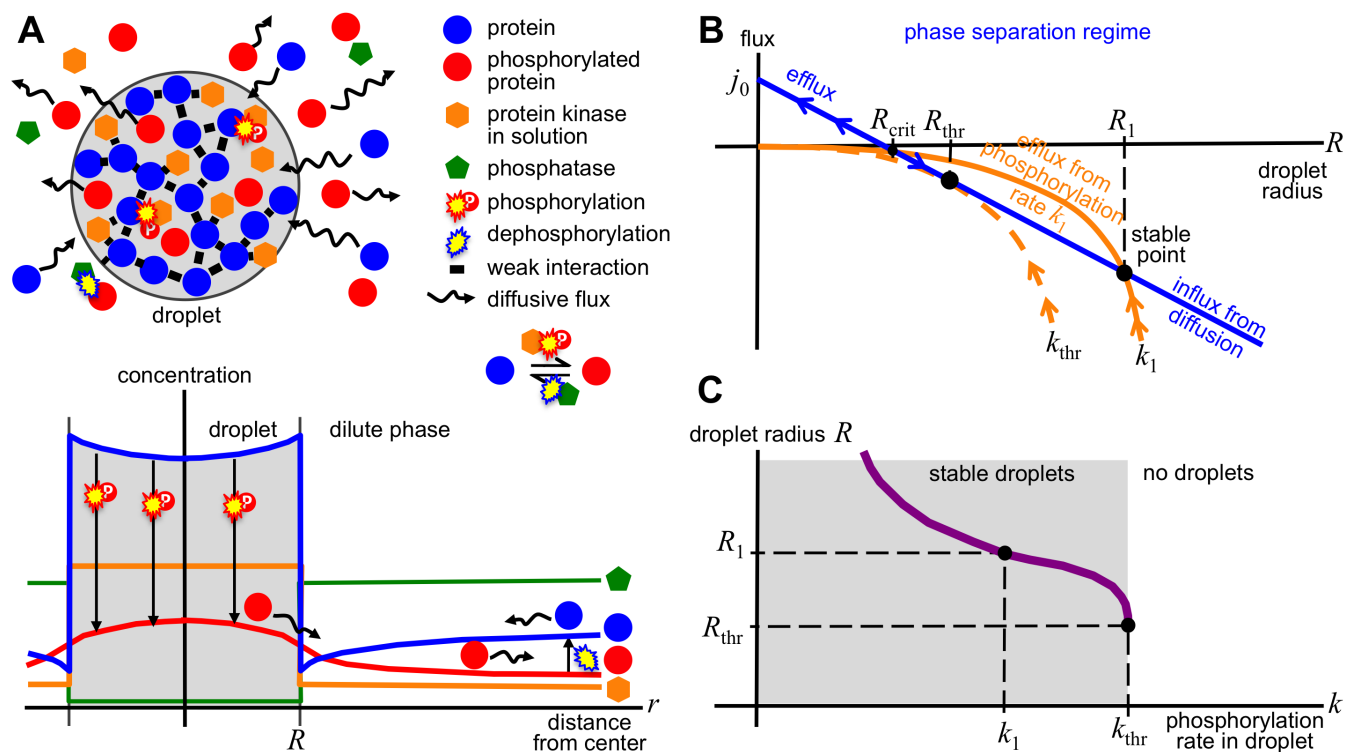

**Figure 2: Enrichment-inhibition model.** Condensate droplets can form when the concentration of unphosphorylated proteins is above the saturation concentration  $c_{out}$ . Phosphorylation weakens protein interactions, so condensates can be dissolved by increasing kinase activity. **A** The unphosphorylated proteins (blue) and kinase (orange) get concentrated in the condensates via multivalent, attractive interactions. There, the kinase phosphorylates condensate proteins (red bursts). The non-interacting phosphorylated proteins (red) diffuse out of the condensate. Outside, they get dephosphorylated (blue burst). Unphosphorylated proteins diffuse back into the condensate along the gradient of concentration (blue), compensating the outward flux of phosphorylated proteins. **B** Without losses from phosphorylation, condensates in the phase separation regime grow by diffusive influx if their radius  $R$  is above a critical value  $R_{crit}$ , whereas small condensates shrink (blue arrows). Because the influx grows linearly with condensate radius  $R$  whereas loss through phosphorylation grows with the condensate volume  $(4\pi/3)R^3$  (orange), a stable radius  $R_1$  results. **C** This radius depends on the phosphorylation rate  $k$  and shows a switch-like response.

106 resulting in a stable condensate size.

107 We propose the loss mechanism to be the modifica-  
 108 tion of condensate proteins or RNA by an antagonistic  
 109 regulating enzyme (orange) that is itself enriched in the  
 110 condensate (Figure 2A). We use phosphorylation as an  
 111 example, but the mechanisms work the same for other  
 112 modifications (see below). The phosphorylation rate  
 113 scales with the condensate volume if the concentration  
 114 of unphosphorylated proteins (blue) is approximately  
 115 constant in the condensate. In this model, unphos-  
 116 phosphorylated proteins as well as the kinases attract each  
 117 other, while the phosphorylation weakens the interac-  
 118 tions with other condensate proteins.

119 Since the concentration of the unphosphorylated pro-  
 120 teins is above saturation, the concentration decreases  
 121 towards the condensate, leading to a net influx of un-  
 122 phosphorylated proteins (Figure 2A). This influx is com-  
 123 pensated by the loss of proteins that get phosphory-  
 124 lated inside the condensate, which diffuse out along  
 125 the negative concentration gradient. Outside, they are  
 126 dephosphorylated by phosphatases (green), closing the  
 127 circle of protein flux.

128 To avoid wasting energy by a short-circuited  
 129 phosphorylation-dephosphorylation reaction, the phos-  
 130 phatase and kinase would best be concentrated in dif-  
 131 ferent phases. Therefore, we expect the phosphatase to  
 132 be strongly depleted in the condensates.

133 Figure 2B shows that, for phosphorylation rates  $k$  be-  
 134 low a certain threshold  $k_{thr}$ , all condensates will grow  
 135 or shrink to the same stable radius  $R$ , which is deter-  
 136 mined by  $k$ . The dependence of  $R$  on the phosphoryla-  
 137 tion rate  $k$  has a switch-like behaviour (Figure 2C):  
 138 Above  $k_{thr}$ , no condensates can exist.

139 It can seem counter-intuitive at first that the droplet-  
 140 dissolving kinase enriches in the droplet. Yet, it is  
 141 exactly this feature that allows the droplet growth to  
 142 be self-limiting.

### 143 The localization-induction model

144 Below the saturation concentration, no condensates can  
 145 form. However, it is possible to *locally* push the concen-  
 146 tration of proteins above saturation, in a small volume.  
 147 This could be achieved if, in contrast to the previous

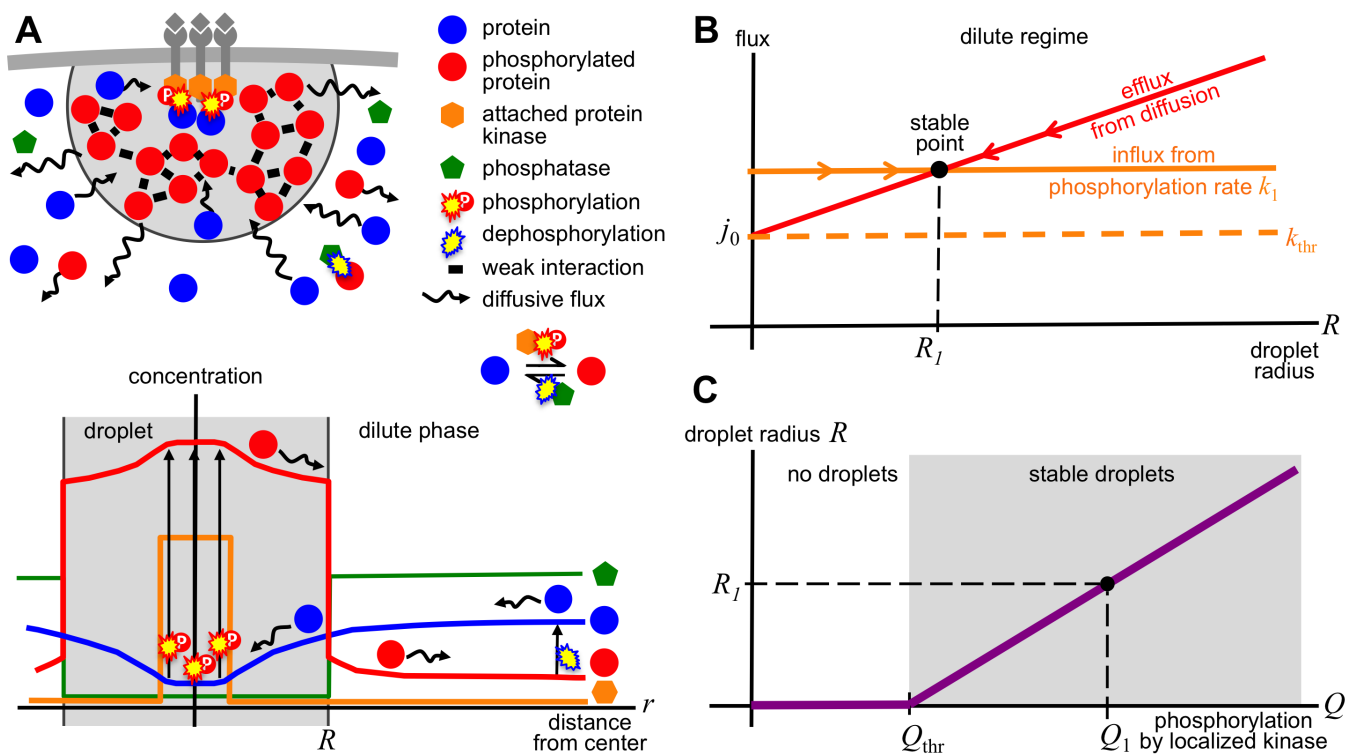

**Figure 3: Localization-induction model.** **A** Condensates can form when kinases (orange), bound or attached to a cellular structure such as a membrane, locally phosphorylate proteins (blue). This locally raises the concentration of the phosphorylated proteins (red), which can bind to each other through multivalent interactions, above the threshold for phase separation. Because the concentration of phosphorylated proteins outside the condensate is below saturation, the condensate loses phosphorylated proteins through diffusive flux (wiggly arrows). Outside, they get dephosphorylated (blue burst). Unphosphorylated proteins diffuse back into the condensate, compensating the outward flux of phosphorylated proteins. **B** Without kinase activity (orange), condensates in the dilute regime would shrink rapidly by diffusive efflux. Because the kinase activity supplies phosphorylated proteins at a constant rate  $Q_1$ , a stable equilibrium is reached at radius  $R_1$ . Below rate  $Q_{thr}$ , no condensates can form. **C** Above  $Q_{thr}$ , stable condensates form, whose radius depends linearly on  $Q$ .

148 model, the kinase acts agonistically and the phospho-  
 149 rylated proteins are attracted to each other through  
 150 multivalent interactions, while the unphosphorylated  
 151 proteins have little or no affinity for each other and  
 152 other condensate proteins. With that assumption, the  
 153 locally confined phosphorylation represents a source of  
 154 condensate proteins that can compensate the diffusive  
 155 loss that, below saturation, would otherwise cause the  
 156 fast shrinkage and disappearance of any condensate.

157 Figure 3A illustrates the model. Phosphorylated  
 158 proteins get generated at the site where the kinases  
 159 are attached or bound, near the center of the conden-  
 160 sate (Zwicker et al., 2018). From there, phosphorylated  
 161 proteins diffuse out along the negative gradient of the  
 162 concentration, which drops towards the outside. Out-  
 163 side of the condensate, the phosphorylated proteins get  
 164 dephosphorylated by phosphatases. The dephospho-  
 165 rylated proteins diffuse in towards the center of the  
 166 condensate to the point of lowest concentration, where  
 167 the kinase activity depletes them, closing the circle of  
 168 protein flux.

169 As in the previous model, we expect the phosphatase  
 170 to be strongly depleted in the condensates to minimize

171 waste of ATP by premature dephosphorylation.

172 Figure 3B shows that, for phosphorylation rates  $Q$   
 173 below a certain threshold  $Q_{thr}$ , no condensates can form  
 174 because the efflux from a tiny drop is larger than the  
 175 rate with which phosphorylated proteins are generated  
 176 by the kinases. Above  $Q_{thr}$ , the condensate radius  $R$   
 177 depends linearly on kinase activity (Figure 3C).

### 178 Size regulation of transmembrane receptor clusters

179 Localization-induction, applied to phase transitions in  
 180 two dimensions, can explain observations that at least  
 181 some types of transmembrane receptors organize into  
 182 dense clusters of fixed size upon binding to extracel-  
 183 lular ligands (Case et al., 2019; Chamma et al., 2016;  
 184 Thievensen et al., 2013; Rogacki et al., 2018).

185 Analogous to three dimensions, phase separation  
 186 can occur in two dimensions above a certain saturation  
 187 surface density, with the formation of clusters of high  
 188 density surrounded by low-density regions (Banjade  
 189 and Rosen, 2014; Case et al., 2019). However, analogous  
 190 to the 3D case, large clusters would grow at the expense  
 191 of small ones in an unregulated fashion.

In the Supplementary Material we describe a model that explains how cluster size might be regulated to a fixed size. Ligand-bound receptor kinases can cross-phosphorylate each other. Phosphorylation increases the affinity for binding each other. Stable cluster sizes are obtained from a balance of the diffusive influx, which in 2D depends only weakly on the cluster radius  $R$ , and a loss of receptors from the cluster through receptor dephosphorylation, which scales between  $R$  and  $R^2$ .

### Regulation by other modifications

Regulation of condensate formation and size requires a signal input. This will mostly be the activity level of a kinase. However, other posttranslational modifications can take the role of phosphorylation. The posttranslational modification reaction, driven by ATP or some other high-energy compound, will supply the energy to maintain the net diffusive flux required for the size-stabilizing losses or gains.

Examples could be SUMOylation, which mediates multivalent interactions with proteins carrying SUMO interacting motifs, e.g. in PML bodies (Weidtkamp-Peters et al., 2008), poly-ADP-ribosylation, which induces condensate formation at DNA repair foci (Altmeyer et al., 2015), arginine dimethylation, which modulates condensate-forming propensities of proteins in RNA granules (Qamar et al., 2018; Ryan et al., 2018; Nott et al., 2015), lysine acetylation and methylation (Gibson et al., 2019), ubiquitination (Danieli and Martens, 2018), and RNA modifications (Drino and Schaefer, 2018). It is also likely that some condensates are regulated via the activity of localized or droplet-enriched phosphatases (Vallardi et al., 2019).

### Regulatory complexity

We envisage that the regulation of many biomolecular condensates will be more complex than the two simple models in two regards. First, condensates will usually be regulated by several kinases or posttranslational modifiers, whose effects on interactions within the condensate all combine. In Cajal bodies, for instance, two kinases regulate their formation but only one of them is localized to Cajal bodies (see below).

Second, some processes will be regulated in a multi-step fashion. For example in signalling cascades, a cascade of different types of condensate subdomains might form, each regulated by a different kinase and each depending on the previous one for the activation of its condensate-regulating kinase.

We surmise that, irrespective of the nature of regulatory complexity, the active regulation of condensates can be understood in terms of a combination of the two simple models.

### Related theoretical work

(Zwicker et al., 2015) and (Wurtz and Lee, 2018a) described how biochemically driven processes can be uti-

lized for active size regulation of condensates. The enrichment-inhibition model is very similar to their models in that an energy-consuming reaction, e.g. phosphorylation, drives the transition between an interacting and a non-interacting protein species. In (Weber et al., 2019), the enrichment-inhibition model and the localization-induction model correspond to externally and internally maintained condensates, respectively. We clarified a crucial assumption, the differential enrichment of the kinase, phosphatase, or ATP (Patel et al., 2017) inside and outside of condensates for efficient size regulation. Without that assumption, the chemical potential of phosphorylated and unphosphorylated proteins would be almost constant in space, the net fluxes would be minimal and size regulation impossible (Supplemental Material).

### Evidence supporting enrichment-inhibition

We give five examples of biomolecular condensates that behave as expected from the enrichment-inhibition model: (1) Their key condensate protein(s) get phosphorylated by a kinase, (2) increased kinase activity dissolves the condensates, and (3) the kinase is enriched in the condensates. The model predicts the main phosphatase to be depleted in the condensates. This information appears to be mostly unavailable.

In the one-cell embryo of the worm *C. elegans*, RNAs and proteins form condensates called *P granules*. These localize to the posterior end of the cell and after cell division end up in the one cell that will give rise to the germ line. *P granules* are highly enriched for the intrinsically disordered MEG proteins. (1) They are phosphorylated by MBK-2 kinase and dephosphorylated by PPTR-1 phosphatase. (2) Phosphorylation of MEGs promotes granule disassembly and dephosphorylation promotes assembly. Furthermore, (3) MBK-2 localizes to *P granules* (Wang et al., 2014).

The vertebrate ortholog of MBK-2, DYRK3, plays a central role as dissolvase of several types of membraneless organelles during mitosis (Rai et al., 2018). This suggests that, as for *P granules*, DYRK3 is involved in the size control of many other types of condensates (Rai et al., 2018) by the enrichment-inhibition model.

*Stress granules (SGs)* are another example. (1) They are regulated by DYRK3 kinase (Wippich et al., 2013). However, since DYRK family kinases are constitutively active, it is unclear how the stress signal could be quickly relayed via DYRK3. (Wurtz and Lee, 2018b) proposed a plausible mechanism: Upon stress, ATP levels can fall by 50%, within the same time scale of SG formation (Hofmann et al., 2012). Also, ATP depletion alone is sufficient to induce SG formation. The reduction in DYRK3 activity ( $k$  in Figure 2C) by ATP depletion reduces the level of phosphorylation of its targets, (1) several of which are key SG proteins. (2) The concomitant increase in favorable interactions then triggers SG formation. Indeed, consistent with the

302 enrichment-inhibition model, (3) DYRK3 localizes to  
303 SGs (Wippich et al., 2013).

304 *Splicing speckles* concentrate proteins involved in pre-  
305 mRNA splicing. These factors possess a terminal low-  
306 complexity RS region enriched for arginine and serine,  
307 which is required for the multivalent interactions within  
308 the speckles. (1) The CLK kinase phosphorylates the RS  
309 domains of splicing factors, and (2) phosphorylation by  
310 CLK promotes disassembly of splicing speckles (Kwon  
311 et al., 2014). Finally, (3) CLK possesses itself an RS  
312 domain that is required and sufficient for its enrichment  
313 within the speckles (Colwill et al., 1996).

314 *Cajal bodies* are nuclear condensates defined by the  
315 key protein coilin. (1 & 2) Hyper-phosphorylation of  
316 coilin by Cdk2/cyclin E or Vrk1 dissolves them. In  
317 contrast to Vrk1, (3) Cdk2/cyclin is strongly enriched  
318 in Cajal bodies (Liu et al., 2000; Cantarero et al., 2015).

319 Neurotransmitter-containing *synaptic vesicles (SV)*  
320 form dense clusters at synapses. (Milovanovic et al.,  
321 2018) discovered that synapsin, the major constituent  
322 of the matrix around SVs, formed condensates under  
323 physiological conditions. The condensates concen-  
324 trated small lipid vesicles, explaining SV clustering at  
325 synapses. (1) CaMKII kinase phosphorylates synapsin  
326 and (2) its activity dissolved SV clusters in vivo in the  
327 presence of ATP. (3) Finally, CaMKII localized to the  
328 condensates as expected (Milovanovic et al., 2018).

### 329 Evidence supporting localization-induction

330 The localization-induction model predicts three fea-  
331 tures: (1) The key condensate protein(s) get phospho-  
332 rylated by a kinase, (2) whose phosphorylation activity  
333 promotes condensate formation, and (3) the kinase is  
334 targeted or attached to a specific cellular location. Here  
335 we discuss examples for cellular processes that appear  
336 to be actively regulated by localization-induction.

337 *T-cell signal transduction* exemplifies localization-  
338 induction in two dimensions. The T cell receptor kinase  
339 gets phosphorylated and can then recruit and bind the  
340 membrane-bound ZAP70 kinase, which thereby gets  
341 localized (3). The phosphorylation of T cell receptors  
342 also turns on the activity of its kinase domain, which  
343 phosphorylates and thereby activates the bound ZAP70  
344 kinase. (1) Activated ZAP70 phosphorylates the key  
345 membrane-bound protein LAT. (2) Phosphorylation en-  
346 ables favorable interactions with several other proteins,  
347 with which LAT then forms a quasi two-dimensional  
348 condensate at the inner plasma membrane surface. The  
349 condensate excludes the LAT-dephosphorylating phos-  
350 phatase CD45, but recruits the machinery for actin  
351 assembly, which can form condensates of its own to  
352 induce cytoskeletal changes (Su et al., 2016).

353 Many transmembrane signalling processes start by  
354 the formation of transmembrane receptor clusters. Case  
355 and colleagues argue that many other transmembrane  
356 signalling processes (using glycosylated receptors, im-  
357 mune receptors, cell adhesion receptors, Wnt receptors,  
358 and receptor tyrosine kinases) possess features that

359 suggest they too involve liquid-liquid phase separa-  
360 tion (Case et al., 2019).

361 Another example for localization-induction is the *as-*  
362 *sembly of microtubules*. Metaphase centrosomes consist  
363 of a core structure called the centriole pair, surrounded  
364 by a condensed phase, the pericentriolar matrix (Con-  
365 duit et al., 2015). (1) This condensate forms by phase  
366 separation of Cnn in *Drosophila* (Raff, 2019) and en-  
367 hances the nucleation of microtubules during mitosis.  
368 (2) Condensate formation depends on phosphorylation  
369 of Cnn by PLK-1 kinase (3) which is concentrated at the  
370 centrioles (Fu and Glover, 2012; Zwicker et al., 2014).  
371 In accord with the localization-induction model (Figure  
372 3C), the phosphorylation rate determines centrosome  
373 size (Conduit et al., 2014).

374 Microtubule growth and kinetochore loading are also  
375 promoted by localized BuGZ condensates, which en-  
376 hance tubulin concentrations (Jiang et al., 2015). They  
377 are also able to recruit Bub3, which facilitates chromo-  
378 some alignment through binding to kinetochores (Jiang  
379 et al., 2014; Toledo et al., 2014). In neurons, (1) tau  
380 condensates could nucleate localized microtubule bun-  
381 dles and enhance their growth (Hernández-Vega et al.,  
382 2017). (2) As expected, tau phosphorylation enhances  
383 condensate formation (Ambadipudi et al., 2017).

384 Finally, we speculate that the localization-induction  
385 mechanism could contribute to *transcription regulation*.  
386 Condensates can form at transcription initiation sites,  
387 recruiting RNA polymerase II and resulting in tran-  
388 scription (Boehning et al., 2018; Cho et al., 2018; Sabari  
389 et al., 2018; Chong et al., 2018). The location and size of  
390 these condensates needs to be tightly controlled to selec-  
391 tively allow for transcription at thousands of genomic  
392 regions.

### 393 Other mechanisms of size control

394 On longer timescales, condensate formation is certainly  
395 controlled by modulating concentrations of key droplet  
396 components using transcriptional or translational reg-  
397 ulation. Protein aggregation appears to be regulated  
398 by an active de-aggregation mechanism that only kicks  
399 in at large aggregate sizes, much above the critical ra-  
400 dius (Narayanan et al., 2019). The two simple models  
401 might also not help to understand the regulation of the  
402 highly complex geometries of passive and active phases  
403 of chromatin (Gibson et al., 2019; Hilbert et al., 2018)  
404 by a multitude of localized, sequence-specific bind-  
405 ing events that modulate interaction strengths through  
406 modifications to histone tails.

407 In centrosomes of *C. elegans*, size is limited by the  
408 exhaustion of centrosome material (Decker et al., 2011;  
409 Zwicker et al., 2014). Similarly, exhaustion of material  
410 might explain the size control of condensates formed  
411 around cytosolic dsDNA to launch an anti-viral im-  
412 mune response (Du and Chen, 2018). Also the liquid  
413 phase that catches diffusing mRNPs whose encoded  
414 protein is destined for insertion into the membrane at  
415 the rough endoplasmatic reticulum might simply be

416 size-controlled by exhaustion of material (Ma and Mayr, 417 2018). In other cases, sizes of condensates are also pas- 418 sively controlled (Feric and Brangwynne, 2013; Hyman 419 et al., 2014).

### 420 **Missing kinase specificity**

421 The enrichment-inhibition model offers an explanation 422 for the relatively low kinase specificity that is frequently 423 observed in in-vitro phosphorylation experiments and 424 often deviates from the kinase specificity in-vivo (Miller 425 and Turk, 2018). Kinases might attain most of their 426 specificity not from their catalytic domain but from 427 their enrichment in specific types of biocondensates. 428 The latter is likely to be mostly determined by their 429 disordered regions and peptide binding modules. This 430 hypothesis is supported by the high fraction of disor- 431 dered regions in cyclins of cyclin-dependend kinases 432 (CDKs) and in non-CDK kinases.

### 433 **Conclusion**

434 An important advantage of active regulation of biocon- 435 densates is the ability to switch processes or biochemi- 436 cal reactions on or off in response to a signal composed 437 of only a few molecules, such as a DNA double strand 438 break. The extremely cooperative behaviour of phase 439 transitions (even for very small condensates) explains 440 how such weak signals can get translated into the for- 441 mation of a condensate, which then recruits all compo- 442 nents necessary to react to the signal. To understand 443 the magnitude by which condensates can accelerate 444 reaction kinetics (Stroberg and Schnell, 2018), assume 445 that  $n$  proteins are required to form an oligomeric com- 446 plex. If each component is enriched 10-fold within the 447 condensate, by mass action the oligomerization rate 448 would be  $\sim 10^n$ -fold increased.

449 Another advantage of active regulation is the thresh- 450 olding behavior it produces (Figures 2C and 3C), as 451 this can suppresses low-intensity noise and improve 452 the robustness of cellular decisions.

453 We propose two generic mechanisms of active regu- 454 lation, one applying to above-saturation concentra- 455 tions of condensate components and the other to below- 456 saturation concentrations. We discussed many exam- 457 ples illustrating the use of these mechanisms by cells in 458 various pathways.

459 The models make quantitative, experimentally 460 testable predictions about the dependence of forma- 461 tion and size of condensates on kinase activity and 462 component concentrations (Supplementary Materials).

463 The two mechanisms supply unifying principles to 464 the often seemingly incoherent behaviour of various 465 types of biomolecular condensates. The enrichment- 466 inhibition model predicts condensates floating in the 467 cytoplasm or nucleoplasm, such as most membrane- 468 less organelles, to be size-regulated by an antagonistic 469 kinase enriched in the condensates. The localization- 470 inhibition model predicts spatially and temporally lo-

471 calized condensates such as those formed at sites of 472 DNA repair foci to be regulated by an agonistic pos- 473 translationally modifying enzyme at their center.

474 Notably, it predicts these condensates to be stable 475 even at very small radii (Figure 3C), at which the char- 476 acteristic properties of phase-separation are hard to 477 observe by microscopy (Alberti et al., 2019). It is attrac- 478 tive to speculate that many previously detected protein 479 clusters or foci, such as the transcriptional minihubs 480 and hubs observed in (Chong et al., 2018), might actu- 481 ally be tiny, bona-fide phase-separated liquid droplet 482 condensates. The functional relevance of condensates 483 versus non-phase-separated protein aggregations is the 484 strong cooperativity in phase separation. It might, for 485 example, be the cause of the high cooperativity often 486 observed in transcriptional regulation (Park et al., 2019; 487 Hnisz et al., 2017).

488 It is becoming clear that liquid-liquid phase separa- 489 tion is a fundamental concept underlying most as- 490 pects of cellular regulation in eukaryotes. We hope 491 the presented models will help to guide experiments 492 elucidating the functions of biocondensates and to un- 493 derstand their manifold roles in human diseases (Wang 494 and Zhang, 2019).

### 495 **Acknowledgements**

496 We thank Matthew Grieshop for discussions and Klaus 497 Förstemann (LMU), Michael Sattler, (TUM), Axel 498 Imhof (LMU), Melina Schuh (MPI-BPC), and Ralf 499 Krätzner (UMG) for feedback to the manuscript. JS 500 and SSJ acknowledge support by grants SPP1935 and 501 SPP2191 of the Deutsche Forschungsgemeinschaft.

### 502 **Author Contributions**

503 JS and DZ initiated the study. JS designed and pre- 504 pared main figures. JS wrote manuscript with input 505 from all authors. SSJ drafted introduction and evi- 506 dence supporting localization-induction. MB drafted 507 evidence supporting enrichment-inhibition. DZ and JK 508 contributed to theoretical modelling.

### 509 **Declaration of interests**

510 The authors declare no competing interests.

### 511 **References**

- 512 Alami, N. H., Smith, R. B., Carrasco, M. A., Williams, L. A., Winborn, 513 C. S., Han, S. S., Kiskinis, E., Winborn, B., Freibaum, B. D., Kanagaraj, 514 A. et al. (2014). Axonal transport of TDP-43 mRNA granules is 515 impaired by ALS-causing mutations. *Neuron* *81*, 536–543.
- 516 Alberti, S., Gladfelter, A. and Mittag, T. (2019). Considerations and 517 challenges in studying liquid-liquid phase separation and biomolecu- 518 lar condensates. *Cell* *176*, 419–434.
- 519 Altmeyer, M., Neelsen, K. J., Teloni, F., Pozdnyakova, I., Pellegrino, S., 520 Gröfte, M., Rask, M.-B. D., Streicher, W., Jungmichel, S., Nielsen, M. L. 521 et al. (2015). Liquid demixing of intrinsically disordered proteins is 522 seeded by poly (ADP-ribose). *Nature Commun.* *6*, 8088.

- 523 Ambadipudi, S., Biernat, J., Riedel, D., Mandelkow, E. and Zweck-  
524 stetter, M. (2017). Liquid-liquid phase separation of the microtubule-  
525 binding repeats of the Alzheimer-related protein Tau. *Nature Comm-*  
526 *mun.* *8*, 275.
- 527 Bah, A. and Forman-Kay, J. D. (2016). Modulation of intrinsically  
528 disordered protein function by post-translational modifications. *J.*  
529 *Biol. Chem.* *291*, 6696–6705.
- 530 Banani, S. F., Lee, H. O., Hyman, A. A. and Rosen, M. K. (2017).  
531 Biomolecular condensates: organizers of cellular biochemistry. *Nature*  
532 *Rev. Mol. Cell Biol.* *18*, 285.
- 533 Banjade, S. and Rosen, M. K. (2014). Phase transitions of multivalent  
534 proteins can promote clustering of membrane receptors. *Elife* *3*,  
535 e04123.
- 536 Bergeron-Sandoval, L.-P., Heris, H. K., Hendricks, A. G., Ehrlicher,  
537 A. J., Francois, P., Pappu, R. V. and Michnick, S. W. (2017). Endocytosis  
538 caused by liquid-liquid phase separation of proteins. *bioRxiv* , doi:  
539 <https://doi.org/10.1101/145664>.
- 540 Boehning, M., Dugast-Darzacq, C., Rankovic, M., Hansen, A. S., Yu, T.,  
541 Marie-Nelly, H., McSwiggen, D. T., Kocic, G., Dailey, G. M., Cramer, P.  
542 et al. (2018). RNA polymerase II clustering through carboxy-terminal  
543 domain phase separation. *Nature Struct. Mol Biol.* *25*, 833.
- 544 Cantarero, L., Sanz-Garcia, M., Vinograd-Byk, H., Renbaum, P., Levy-  
545 Lahad, E. and Lazo, P. A. (2015). VRRK1 regulates Cajal body dynamics  
546 and protects coilin from proteasomal degradation in cell cycle. *Sci.*  
547 *Rep.* *5*, 10543.
- 548 Case, L. B., Ditlev, J. A. and Rosen, M. K. (2019). Regulation of  
549 Transmembrane Signaling by Phase Separation. *Ann. Rev. Biophysics*  
550 *48*, 465–494.
- 551 Chamma, I., Letellier, M., Butler, C., Tessier, B., Lim, K.-H., Gau-  
552 thereau, I., Choquet, D., Sibarita, J.-B., Park, S., Sainlos, M. et al.  
553 (2016). Mapping the dynamics and nanoscale organization of synap-  
554 tic adhesion proteins using monomeric streptavidin. *Nature Commun.*  
555 *7*, 10773.
- 556 Cho, W.-K., Spille, J.-H., Hecht, M., Lee, C., Li, C., Grube, V. and  
557 Cisse, I. I. (2018). Mediator and RNA polymerase II clusters associate  
558 in transcription-dependent condensates. *Science* *361*, 412–415.
- 559 Chong, S., Dugast-Darzacq, C., Liu, Z., Dong, P., Dailey, G. M.,  
560 Cattoglio, C., Heckert, A., Banala, S., Lavis, L., Darzacq, X. et al. (2018).  
561 Imaging dynamic and selective low-complexity domain interactions  
562 that control gene transcription. *Science* *361*, eaar2555.
- 563 Colwill, K., Pawson, T., Andrews, B., Prasad, J., Manley, J., Bell, J. and  
564 Duncan, P. (1996). The Clk/Sty protein kinase phosphorylates SR  
565 splicing factors and regulates their intranuclear distribution. *EMBO*  
566 *J.* *15*, 265–275.
- 567 Conduit, P., Feng, Z., Richens, J., Baumbach, J., Wainman, A., Bak-  
568 shi, S., Dobbelaere, J., Johnson, S., Lea, S. and Raff, J. (2014). The  
569 Centrosome-Specific Phosphorylation of Cnn by Polo/Pik1 Drives  
570 Cnn Scaffold Assembly and Centrosome Maturation. *Dev. Cell* *28*.
- 571 Conduit, P. T., Wainman, A. and Raff, J. W. (2015). Centrosome  
572 function and assembly in animal cells. *Nat. Rev. Mol. Cell Biol.* *16*,  
573 611–24.
- 574 Danieli, A. and Martens, S. (2018). p62-mediated phase separation at  
575 the intersection of the ubiquitin-proteasome system and autophagy.  
576 *J. Cell Sci.* *131*, jcs214304.
- 577 Decker, M., Jaensch, S., Pozniakovskiy, A., Zinke, A., O’Connell, K. F.,  
578 Zachariae, W., Myers, E. and Hyman, A. A. (2011). Limiting Amounts  
579 of Centrosome Material Set Centrosome Size in *C. elegans* Embryos.  
580 *Curr. Biol.* *21*, 1259–1267.
- 581 Drino, A. and Schaefer, M. R. (2018). RNAs, Phase Separation, and  
582 Membrane-Less Organelles: Are Post-Transcriptional Modifications  
583 Modulating Organelle Dynamics? *BioEssays* *40*, 1800085.
- 584 Du, M. and Chen, Z. J. (2018). DNA-induced liquid phase conden-  
585 sation of cGAS activates innate immune signaling. *Science* *361*,  
586 704–709.
- 587 Dundr, M. and Misteli, T. (2010). Biogenesis of nuclear bodies. *Cold*  
588 *Spring Harbor Persp. Biol.* *2*, a000711.
- 589 Feric, M. and Brangwynne, C. P. (2013). A nuclear F-actin scaffold  
590 stabilizes ribonucleoprotein droplets against gravity in large cells.  
591 *Nature Cell Biol.* *15*, 1253.
- 592 Formicola, N., Vijayakumar, J. and Besse, F. (2019). Neuronal  
593 RNP granules: dynamic sensors of localized signals. *Traffic*, doi:  
594 [10.1111/tra.12672](https://doi.org/10.1111/tra.12672) xxx.
- 595 Fu, J. and Glover, D. M. (2012). Structured illumination of the interface  
596 between centriole and peri-centriolar material. *Open Biology* *2*,  
597 120104.
- 598 Fung, H. Y. J., Birol, M. and Rhoades, E. (2018). IDPs in macro-  
599 molecular complexes: the roles of multivalent interactions in diverse  
600 assemblies. *Curr. Opin. Struct. Biol.* *49*, 36–43.
- 601 Gibson, B. A., Doolittle, L. K., Jensen, L. E., Gamarra, N., Red-  
602 ding, S. and Rosen, M. K. (2019). Organization and Regulation  
603 of Chromatin by Liquid-Liquid Phase Separation. *bioRxiv* , doi:  
604 <https://doi.org/10.1101/523662>.
- 605 Hernández-Vega, A., Braun, M., Scharrel, L., Jahnel, M., Wegmann,  
606 S., Hyman, B. T., Alberti, S., Diez, S. and Hyman, A. A. (2017). Local  
607 nucleation of microtubule bundles through tubulin concentration  
608 into a condensed tau phase. *Cell Rep.* *20*, 2304–2312.
- 609 Hilbert, L., Sato, Y., Kimura, H., Jülicher, F., Honigmann, A., Zabur-  
610 daev, V. and Vastenhouw, N. (2018). Transcription organizes eu-  
611 chromatin similar to an active microemulsion. *bioRxiv* , doi:  
612 <https://doi.org/10.1101/234112>.
- 613 Hnisz, D., Shrinivas, K., Young, R. A., Chakraborty, A. K. and Sharp,  
614 P. A. (2017). A phase separation model for transcriptional control.  
615 *Cell* *169*, 13–23.
- 616 Hofmann, S., Cherkasova, V., Bankhead, P., Bukau, B. and Stoecklin,  
617 G. (2012). Translation suppression promotes stress granule formation  
618 and cell survival in response to cold shock. *Mol. Biol. Cell* *23*,  
619 3786–3800.
- 620 Huang, Y., Li, T., Ems-McClung, S. C., Walczak, C. E., Prigent, C.,  
621 Zhu, X., Zhang, X. and Zheng, Y. (2018). Aurora A activation in  
622 mitosis promoted by BuGZ. *J Cell Biol* *217*, 107–116.
- 623 Hyman, A. A., Weber, C. A. and Jülicher, F. (2014). Liquid-liquid  
624 phase separation in biology. *Ann. Rev. Cell Dev. Biol.* *30*, 39–58.
- 625 Jiang, H., He, X., Wang, S., Jia, J., Wan, Y., Wang, Y., Zeng, R., Yates III,  
626 J., Zhu, X. and Zheng, Y. (2014). A microtubule-associated zinc finger  
627 protein, BuGZ, regulates mitotic chromosome alignment by ensuring  
628 Bub3 stability and kinetochore targeting. *Dev. Cell* *28*, 268–281.
- 629 Jiang, H., Wang, S., Huang, Y., He, X., Cui, H., Zhu, X. and Zheng, Y.  
630 (2015). Phase transition of spindle-associated protein regulate spindle  
631 apparatus assembly. *Cell* *163*, 108–122.
- 632 Kwon, I., Xiang, S., Kato, M., Wu, L., Theodoropoulos, P., Wang, T.,  
633 Kim, J., Yun, J., Xie, Y. and McKnight, S. L. (2014). Poly-dipeptides en-  
634 coded by the C9orf72 repeats bind nucleoli, impede RNA biogenesis,  
635 and kill cells. *Science* *345*, 1139–1145.
- 636 Liu, J., Hebert, M. D., Ye, Y., Templeton, D. J., Kung, H. and Matera,  
637 A. G. (2000). Cell cycle-dependent localization of the CDK2-cyclin E  
638 complex in Cajal (coiled) bodies. *J. Cell Sci.* *113*, 1543–1552.
- 639 Ma, W. and Mayr, C. (2018). A Membraneless Organelle Associ-  
640 ated with the Endoplasmic Reticulum Enables 3’ UTR-Mediated  
641 Protein-Protein Interactions. *Cell* *175*, 1492–1506.
- 642 Miao, Y., Tipakornsaowapak, T., Zheng, L., Mu, Y. and Lewellyn, E.  
643 (2018). Phospho-regulation of intrinsically disordered proteins for  
644 actin assembly and endocytosis. *FEBS J.* *285*, 2762–2784.
- 645 Miller, C. J. and Turk, B. E. (2018). Homing in: mechanisms of  
646 substrate targeting by protein kinases. *Trends Biochem. Sci.* *43*, 380–  
647 394.
- 648 Milovanovic, D., Wu, Y., Bian, X. and De Camilli, P. (2018). A liquid  
649 phase of synapsin and lipid vesicles. *Science* *361*, 604–607.
- 650 Narayanan, A., Meriin, A., Andrews, J. O., Spille, J.-H., Sherman,  
651 M. Y. and Cisse, I. I. (2019). A first order phase transition mechanism  
652 underlies protein aggregation in mammalian cells. *eLife* *8*, e39695.



- 653 Nott, T. J., Petsalaki, E., Farber, P., Jervis, D., Fussner, E., Plochowitz,  
654 A., Craggs, T. D., Bazett-Jones, D. P., Pawson, T., Forman-Kay, J. D.  
655 et al. (2015). Phase transition of a disordered nuage protein generates  
656 environmentally responsive membraneless organelles. *Mol. Cell.* *57*,  
657 936–947.
- 658 Park, J., Estrada, J., Johnson, G., Vincent, B. J., Ricci-Tam, C., Bragdon,  
659 M. D., Shulgina, Y., Cha, A., Wunderlich, Z., Gunawardena, J. et al.  
660 (2019). Dissecting the sharp response of a canonical developmental  
661 enhancer reveals multiple sources of cooperativity. *eLife* *8*, e41266.
- 662 Patel, A., Malinowska, L., Saha, S., Wang, J., Alberti, S., Krishnan, Y.  
663 and Hyman, A. A. (2017). ATP as a biological hydrotrope. *Science*  
664 *356*, 753–756.
- 665 Qamar, S., Wang, G., Randle, S. J., Ruggeri, F. S., Varela, J. A., Lin,  
666 J. Q., Phillips, E. C., Miyashita, A., Williams, D., Ströhl, F. et al. (2018).  
667 FUS phase separation is modulated by a molecular chaperone and  
668 methylation of arginine cation- $\pi$  interactions. *Cell* *173*, 720–734.
- 669 Raff, J. W. (2019). Phase Separation and the Centrosome: A Fair  
670 Accompli? *Trends Cell Biol* *xxx*.
- 671 Rai, A. K., Chen, J.-X., Selbach, M. and Pelkmans, L. (2018). Kinase-  
672 controlled phase transition of membraneless organelles in mitosis.  
673 *Nature* *559*, 211.
- 674 Rogacki, M. K., Golfetto, O., Tobin, S. J., Li, T., Biswas, S., Jorand, R.,  
675 Zhang, H., Radoi, V., Ming, Y., Svenningsson, P. et al. (2018). Dynamic  
676 lateral organization of opioid receptors ( $\kappa$ ,  $\mu$ WT and  $\mu$ N40D)  
677 in the plasma membrane at the nanoscale level. *Traffic* *19*, 690–709.
- 678 Ryan, V. H., Dignon, G. L., Zerze, G. H., Chabata, C. V., Silva, R., Con-  
679 icella, A. E., Amaya, J., Burke, K. A., Mittal, J. and Fawzi, N. L. (2018).  
680 Mechanistic view of hnRNPA2 low-complexity domain structure,  
681 interactions, and phase separation altered by mutation and arginine  
682 methylation. *Mol. Cell* *69*, 465–479.
- 683 Sabari, B. R., Dall’Agnese, A., Boija, A., Klein, I. A., Coffey, E. L.,  
684 Shrinivas, K., Abraham, B. J., Hannett, N. M., Zamudio, A. V., Man-  
685 teiga, J. C. et al. (2018). Coactivator condensation at super-enhancers  
686 links phase separation and gene control. *Science* *361*, eaar3958.
- 687 Shin, Y. and Brangwynne, C. P. (2017). Liquid phase condensation in  
688 cell physiology and disease. *Science* *357*, eaaf4382.
- 689 So, C., Seres, K. B., Steyer, A. M., Mönnich, E., Clift, D., Pejkovska,  
690 A., Möbius, W. and Schuh, M. (2019). A liquid-like spindle domain  
691 promotes acerosomal spindle assembly in mammalian oocytes.  
692 *Science* *364*.
- 693 Spitzer, J. J. and Poolman, B. (2005). Electrochemical structure of the  
694 crowded cytoplasm. *Trends Biochem. Sci.* *30*, 536–541.
- 695 Stradner, A., Sedgwick, H., Cardinaux, F., Poon, W. C., Egelhaaf,  
696 S. U. and Schurtenberger, P. (2004). Equilibrium cluster formation in  
697 concentrated protein solutions and colloids. *Nature* *432*, 492.
- 698 Stroberg, W. and Schnell, S. (2018). Do cellular condensates accel-  
699 erate biochemical reactions? Lessons from microdroplet chemistry.  
700 *Biophys. J.* *115*, 3–8.
- 701 Su, X., Ditlev, J. A., Hui, E., Xing, W., Banjade, S., Okrut, J., King, D. S.,  
702 Taunton, J., Rosen, M. K. and Vale, R. D. (2016). Phase separation  
703 of signaling molecules promotes T cell receptor signal transduction.  
704 *Science* *352*, 595–599.
- 705 Tatavosian, R., Kent, S., Brown, K., Yao, T., Duc, H. N., Huynh,  
706 T. N., Zhen, C. Y., Ma, B., Wang, H. and Ren, X. (2019). Nuclear  
707 condensates of the Polycomb protein chromobox 2 (CBX2) assemble  
708 through phase separation. *J. Biol. Chem.* *294*, 1451–1463.
- 709 Thievensen, I., Thompson, P. M., Berlemont, S., Plevock, K. M., Plot-  
710 nikov, S. V., Zemljic-Harpf, A., Ross, R. S., Davidson, M. W., Danuser,  
711 G., Campbell, S. L. et al. (2013). Vinculin–actin interaction couples  
712 actin retrograde flow to focal adhesions, but is dispensable for focal  
713 adhesion growth. *J. Cell Biol.* *202*, 163–177.
- 714 Toledo, C. M., Herman, J. A., Olsen, J. B., Ding, Y., Corrin, P., Girard,  
715 E. J., Olson, J. M., Emili, A., DeLuca, J. G. and Paddison, P. J. (2014).  
716 BuGZ is required for Bub3 stability, Bub1 kinetochore function, and  
717 chromosome alignment. *Developmental cell* *28*, 282–294.
- 718 Vallardi, G., Allan, L. A., Crozier, L. and Saurin, A. T. (2019). Divi-  
719 sion of labour between PP2A-B56 isoforms at the centromere and  
720 kinetochore. *eLife* *8*, e42619.
- 721 Wang, J. T., Smith, J., Chen, B.-C., Schmidt, H., Rasoloson, D., Paix,  
722 A., Lambrus, B. G., Calidas, D., Betzig, E. and Seydoux, G. (2014).  
723 Regulation of RNA granule dynamics by phosphorylation of serine-  
724 rich, intrinsically disordered proteins in *C. elegans*. *eLife* *3*, e04591.
- 725 Wang, Z. and Zhang, H. (2019). Phase separation, transition, and  
726 autophagic degradation of proteins in development and pathogenesis.  
727 *Trends Cell Biol.* *29*, 417–427.
- 728 Weber, C. A., Zwicker, D., Jülicher, F. and Lee, C. F. (2019). Physics of  
729 Active Emulsions. *Rep. Prog. Phys.* ?
- 730 Weidtkamp-Peters, S., Lenser, T., Negorev, D., Gerstner, N., Hofmann,  
731 T. G., Schwanitz, G., Hoischen, C., Maul, G., Dittrich, P. and Hem-  
732 merich, P. (2008). Dynamics of component exchange at PML nuclear  
733 bodies. *J. Cell Sci.* *121*, 2731–2743.
- 734 Weirich, K. L., Banerjee, S., Dasbiswas, K., Witten, T. A., Vaikun-  
735 tanathan, S. and Gardel, M. L. (2017). Liquid behavior of cross-linked  
736 actin bundles. *Proc. Natl. Acad. Sci. U.S.A.* *114*, 2131–2136.
- 737 Wippich, F., Bodenmiller, B., Trajkovska, M. G., Wanka, S., Aebersold,  
738 R. and Pelkmans, L. (2013). Dual specificity kinase DYRK3 couples  
739 stress granule condensation/dissolution to mTORC1 signaling. *Cell*  
740 *152*, 791–805.
- 741 Wu, X., Cai, Q., Shen, Z., Chen, X., Zeng, M., Du, S. and Zhang,  
742 M. (2019). RIM and RIM-BP Form Presynaptic Active-Zone-like  
743 Condensates via Phase Separation. *Mol. Cell* *73*, 971–984.
- 744 Wurtz, J. D. and Lee, C. F. (2018a). Chemical-Reaction-Controlled  
745 Phase Separated Drops: Formation, Size Selection, and Coarsening.  
746 *Phys. Rev. Lett.* *120*, 078102.
- 747 Wurtz, J. D. and Lee, C. F. (2018b). Stress granule formation via ATP  
748 depletion-triggered phase separation. *New J. Phys.* *20*, 045008.
- 749 Zeng, M., Chen, X., Guan, D., Xu, J., Wu, H., Tong, P. and Zhang, M.  
750 (2018). Reconstituted postsynaptic density as a molecular platform for  
751 understanding synapse formation and plasticity. *Cell* *174*, 1172–1187.
- 752 Zwicker, D., Baumgart, J., Redemann, S., Müller-Reichert, T., Hyman,  
753 A. A. and Jülicher, F. (2018). Positioning of Particles in Active Droplets.  
754 *Phys. Rev. Lett.* *121*, 158102.
- 755 Zwicker, D., Decker, M., Jaensch, S., Hyman, A. A. and Jülicher,  
756 F. (2014). Centrosomes are autocatalytic droplets of pericentriolar  
757 material organized by centrioles. *Proc. Natl. Acad. Sci. U.S.A.* *111*,  
758 E2636–E2645.
- 759 Zwicker, D., Hyman, A. A. and Jülicher, F. (2015). Suppression of  
760 Ostwald ripening in Active Emulsions. *Phys. Rev. E* *92*, 012317.

## Supplementary Material

### Condensate droplet growth and shrinkage in a passive, phase-separating system

#### Protein concentration $c_R(R)$ just outside a condensate of radius $R$

We derive here the formula for the protein concentration just outside a condensate of radius  $R$  (Figure 4A),

$$c_R(R) = c_{\text{out}} \left( 1 + \frac{l_c}{R} \right), \quad (1)$$

where  $c_{\text{out}}$  is the concentration outside a condensate droplet of infinite radius  $R \rightarrow \infty$  and  $l_c$  the capillary length, a measure of the strength of interaction between the proteins.

For a condensate of radius  $R$  we call the protein concentration just on its outside  $c_R(R)$  and the concentration inside  $c_{\text{in}}$ . We imagine to transfer from just the outside to the inside of the condensate a single protein together with just the right amount of solvent that this tiny volume  $dV$  has the same concentration as the inside of the droplet. That means  $1 = dV c_{\text{in}}$ , or  $dV = c_{\text{in}}^{-1}$ . The radius of the condensate will increase from  $R$  to  $R + dR$ .  $dR$  can be obtained by solving the equation for the conservation of volume  $(4\pi/3)(R + dR)^3 - (4\pi/3)R^3 = dV$ , yielding

$$dR = dV / (4\pi R^2). \quad (2)$$

The change in free energy for the transfer must be zero at equilibrium between the two phases. The change of free energy is the change in interaction energy  $\Delta E$  plus the change in chemical potential  $\Delta\mu$ , which accounts for the entropic effects:

$$\Delta F = \Delta E + \Delta\mu = 0 \quad (3)$$

We define  $-\varepsilon$  as the change in interaction energy of the protein when transferred from the outside of an infinitely extended phase ( $R \rightarrow \infty$ ) to the inside. The change is slightly lower for a finite-sized condensate or radius  $R$ , due to surface tension:

$$\begin{aligned} \Delta E &= -\varepsilon + 4\pi(R + dR)^2\gamma - 4\pi R^2\gamma \\ &= -\varepsilon + 8\pi\gamma R dR + \text{const.} \times (dR)^2 \\ &= -\varepsilon + \frac{2dV\gamma}{R}. \end{aligned} \quad (4)$$

where the term  $2dV\gamma/R = 2\gamma/(c_{\text{in}} R)$  describes the work done against the surface tension  $\gamma$  of the condensate. The change in chemical potential is

$$\Delta\mu = k_B T \log c_{\text{in}} - k_B T \log c_R(R). \quad (5)$$

Putting everything together, we obtain

$$k_B T \log \frac{c_R(R)}{c_{\text{in}}} = -\varepsilon + \frac{2\gamma}{c_{\text{in}} R}. \quad (6)$$

Defining the capillary length,

$$l_c = \frac{2\gamma}{k_B T c_{\text{in}}}, \quad (7)$$

we get

$$c_R(R) = c_{\text{in}} e^{-\frac{\varepsilon}{k_B T}} e^{l_c/R}. \quad (8)$$

By setting  $R$  to  $\infty$ , we obtain  $c_{\text{out}} = c_{\infty}(\infty) = c_{\text{in}} e^{-\frac{\varepsilon}{k_B T}}$  and therefore

$$c_R(R) = c_{\text{out}} e^{l_c/R} \approx c_{\text{out}} \left( 1 + \frac{l_c}{R} \right). \quad (9)$$

The approximation is accurate for  $l_c/R \ll 1$ . The finite- $R$  correction term  $c_{\text{out}} l_c/R$  is called Laplace pressure in physics.

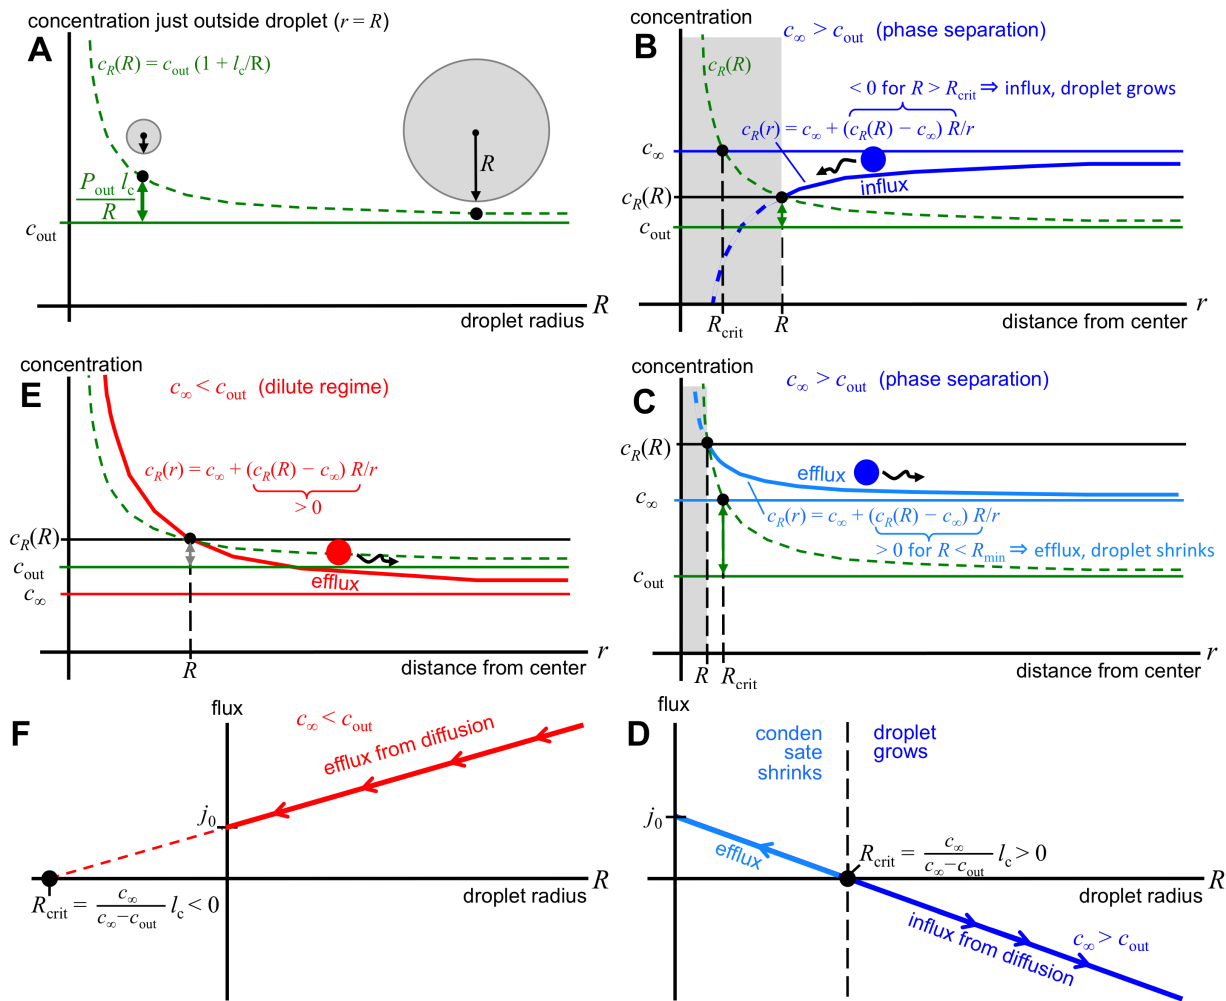

**Figure 4: Concentration and flux around liquid droplet condensates in a passive system.** **A** The protein concentration just outside a condensate of radius  $R$  is higher by  $c_{out}l_c/R$  than the concentration  $c_{out}$  outside an infinitely extended phase ( $R \rightarrow \infty$ ). **B** Protein concentration around a condensate of radius  $R$  if the concentration  $c_{\infty}$  at distance  $r \rightarrow \infty$  is larger than  $c_{out}$  and condensates above the critical radius,  $R > R_{crit}$ . **C** Protein concentration for the case  $c_{\infty} > c_{out}$  and condensates with  $R < R_{crit}$ . **D** Net diffusive flux out of condensates of size  $R$  for  $c_{\infty} > c_{out}$ . **E** Protein concentration if  $c_{\infty} < c_{out}$ . **F** Net diffusive flux out of condensates of size  $R$  for  $c_{\infty} < c_{out}$ .

#### 786 Concentration $c_R(r)$ around a condensate of radius $R$ and net flux out of condensate

787 We imagine that only a single condensate of radius  $R$  floats in the dilute phase of infinite extension, and the protein  
 788 concentration at infinite distance  $r$  from the condensate center is  $c_{\infty}$ . For symmetry reasons, the protein concentration  
 789 will be the same everywhere on a spherical shell of radius  $r$  around the condensate, so we can write it as a  $c_R(r)$ .

790 From statistical physics we know that a concentration gradient  $\nabla p$  causes a net diffusive flux density  $j$  in the  
 791 opposite direction of the gradient, measured in particles per second per area through which the particles diffuse:  
 792  $\mathbf{j} = -D\nabla p$ . The proportionality constant is the diffusion coefficient  $D$ . Applied to our system, the flux density  
 793 through a spherical shell of radius  $r$  around the condensate is

$$j(r) = -D \frac{\partial}{\partial r} c_R(r). \quad (10)$$

794 The total flux integrated over the entire shell surface  $4\pi r^2$  is therefore  $-4\pi D r^2 \frac{\partial c_R(r)}{\partial r}$ . At equilibrium concentrations,  
 795 the flux through each sphere of radius  $r > R$  must be constant, since no proteins can be created or lost between  
 796 shells:

$$\text{const.} = -4\pi D r^2 \frac{\partial}{\partial r} c_R(r). \quad (11)$$

797 (The assumption of constant flux holds only approximately, for low rates of (de-)phosphorylation, in the active  
 798 systems discussed in Figs 2 and 3.) This differential equation is solved by  $c_R(r) = \alpha + \beta/r$ . To obtain  $\alpha$  and  $\beta$ , we use

799 the boundary conditions at  $r = R$  and  $r = \infty$ ,

$$c_R(R) = \alpha + \beta/R = c_{\text{out}} \left(1 + \frac{l_c}{R}\right) \quad (12)$$

$$c_R(\infty) = \alpha = c_{\infty}. \quad (13)$$

800 From this it follows that  $\beta = (c_R(R) - p(\infty))R$  and

$$c_R(r) = c_{\infty} + (c_{\infty} - c_{\text{out}}) \left(-1 + \frac{R_{\text{crit}}}{R}\right) \frac{R}{r}. \quad (14)$$

801 with

$$R_{\text{crit}} = \frac{c_{\infty}}{c_{\infty} - c_{\text{out}}} l_c. \quad (15)$$

802 The total flux of proteins leaving the condensate is

$$\text{flux} = 4\pi D R^2 \left. \frac{\partial c_R(r)}{\partial r} \right|_{r=R} \quad (16)$$

$$= -4\pi D (c_{\infty} - c_{\text{out}}) (R - R_{\text{crit}}). \quad (17)$$

803 This result is plotted in Figure 4D for the case  $c_{\infty} > c_{\text{out}}$ . In that case, for condensates above the critical radius,  
804  $R > R_{\text{crit}}$ , the concentration decreases towards the condensate and the net flux flows towards the condensate (Figure  
805 4B), making the condensate grow. For condensates below the critical radius,  $R < R_{\text{crit}}$ , the concentration increases  
806 towards the condensate and the net flux flows away from the condensate (Figure 4C), making the condensate shrink.

807 For the case  $c_{\infty} > c_{\text{out}}$  (Figures 4E,F), the concentration increases towards the condensates for any radius, and the  
808 condensate flux will be directed outwards, shrinking the condensate. The critical radius for this case is negative and  
809 the flux depends on the radius as shown in Figure 4F.

### 810 Threshold radius $R_{\text{thr}}$ and condensate radius $R(k)$ for the enrichment-inhibition model

811 For the enrichment-inhibition model, we can determine the threshold radius  $R_{\text{thr}}$  of by solving  $R$  under the constraints  
812 that

$$\frac{\partial}{\partial R} \text{flux}(R_{\text{thr}}) = 0 \quad (18)$$

$$\text{flux}(R) = 0. \quad (19)$$

813 We insert the total flux

$$\text{flux}(R) = -4\pi D (c_{\infty} - c_{\text{out}}) (R - R_{\text{crit}}) + \frac{4\pi}{3} R^3 c_{\text{in}} k \quad (20)$$

814 and obtain

$$-4\pi D (c_{\infty} - c_{\text{out}}) + 4\pi R^2 c_{\text{in}} k = 0 \quad (21)$$

$$-4\pi D (c_{\infty} - c_{\text{out}}) (R - R_{\text{crit}}) - \frac{1}{3} R \times 4\pi D (c_{\infty} - c_{\text{out}}) = 0 \quad (22)$$

$$(23)$$

815 and hence

$$R_{\text{thr}} = \frac{3}{2} R_{\text{crit}} = \frac{3}{2} \frac{c_{\infty}}{c_{\infty} - c_{\text{out}}} l_c. \quad (24)$$

816 To find the condensate radius  $R(k)$  for a given phosphorylation rate per volume,  $k$ , with

$$k \propto c_{\text{kinase,in}} c_{\text{ATP,in}}, \quad (25)$$

817 one can simply solve the cubic equation  $\text{flux}(R) = 0$ , which has an analytical solution (Cardano formula).

### 818 Condensate radius $R(Q)$ for the localization-induction model

819 The radius  $R(Q)$  follows from the zero total flux condition

$$\text{flux}(R) = -4\pi D (c_{\infty} - c_{\text{out}}) (R - R_{\text{crit}}) - Q = 0, \quad (26)$$

820 where  $Q$  is the total amount of phosphorylated proteins per time supplied to the condensate by the localized kinase.

821 This yields, for  $c_{\infty} < c_{\text{out}}$

$$R(Q) = \frac{Q}{4\pi D (c_{\text{out}} - c_{\infty})} + R_{\text{crit}} = \frac{c_{\infty}}{c_{\text{out}} - c_{\infty}} \left( \frac{Q}{4\pi D c_{\infty}} - l_c \right). \quad (27)$$

## Size regulation of transmembrane receptor clusters

Many transmembrane receptors organize into dense, supramolecular clusters of a certain preferred size upon binding to extracellular ligands (Case et al., 2019; Chamma et al., 2016; Thievensen et al., 2013; Rogacki et al., 2018). A fixed cluster size can be advantageous: Clusters need to be large enough for the kinase activity of the entire cluster to surpass the threshold rate  $k_{\text{thr}}$  for forming a localized liquid droplet at the membrane (Figure 3C). On the other hand, the uncontrolled size of receptor clusters would lead to an uncontrolled size of the localized droplets inside. Also, oversized clusters would deplete receptors and suppress signal transduction elsewhere.

Analogous to three dimensions, phase separation can occur also in two dimensions above a certain saturation surface density (Banjade and Rosen, 2014; Case et al., 2019), with the formation of clusters of high density surrounded by low-density regions. If ligand-bound receptors interacted while unbound did not, or more weakly, increasing the ligand concentration and thus the fraction of ligand-bound receptors would increase the surface density of ligand-bound, interacting receptors. When that density is pushed above the 2D saturation threshold, clusters would form. The mechanism would nicely explain the sharp onset of cluster formation upon a small change of ligand density. However, analogous to the 3D case, coarsening would lead to the growth of large clusters and shrinkage of small ones, not to clusters of fixed sizes.

Biophysical models can in principle explain the formation of clusters of fixed size by an interplay of short-range attraction between receptors and long-range repulsion (Case et al., 2019; Stradner et al., 2004) (just like the attractive, short-range strong nuclear force and the repulsive, long-range electrostatic force between protons in atomic nuclei explains the "valley of stability"). However, this model requires weak electrostatic screening (Case et al., 2019; Stradner et al., 2004), more precisely, the Debye length for the exponential decay of electric fields around charges must be at least on the order of the cluster size, whereas in fact in cells the Debye length is probably below a nanometer (Spitzer and Poolman, 2005).

The following two-dimensional version of the localization-induction model might explain how the cluster sizes can be regulated. Transmembrane receptors can exist in three states, unbound, bound, and phosphorylated. Ligand-bound receptors can cross-phosphorylate other receptors, unbound ones cannot. Active receptors get inactivated by dephosphorylation by a phosphatase with a certain rate. A stable cluster size should be achievable under the assumption that phosphorylated receptors bind to each other with higher affinity than unphosphorylated ones. Importantly, this assumption, which requires phosphorylation as an active, driven process, makes the ligand off-rate independent of whether the receptor is part of a cluster or not.

When a receptor gets dephosphorylated, the receptor can be lost from the cluster. If the mean net distance that unphosphorylated receptors travels by diffusion until it gets rephosphorylated is large in comparison to the cluster size, most receptor dephosphorylations will result in the loss of the receptor from the cluster, yielding a loss rate proportional to the number of receptors in the cluster times the phosphorylation rate, hence proportional to its radius squared,  $R^2$ . If the mean net distance travelled is much smaller than the droplet radius  $R$ , only a fraction of receptors dephosphorylated near to the edge of the cluster will get lost from the cluster. In this case, the loss rate is proportional to the circumference of the cluster,  $2\pi R$ .

The loss is compensated by the influx of inactive receptors, which will be phosphorylated through contact with ligand-bound receptors in the cluster. The influx can be shown to roughly be proportional to  $(\log d/R)^{-1}$ , where  $d = (\pi\rho)^{-1/2}$  is the root mean squared distance between clusters and  $\rho$  is the number of clusters of size  $R$  per cell surface area. The balance between the influx dropping with increasing  $R$  and the loss growing with  $R$  or  $R^2$  can then yield in a stable cluster size  $R$ .

## Enrichment of kinase, phosphatase or ATP is necessary for size stabilization

In simple systems without chemical reactions, biochemical condensates are regions enriched in droplet material that are in equilibrium with the surrounding solvent such that the chemical potentials are constant in space ( $\mu_i = \text{const.}$ ); see Fig. 5A. Consequently, no spatial fluxes (which would be driven by gradients in chemical potential) exist. Because of surface tension, large droplets are energetically favorable, so that the equilibrium state is a single droplet whose size is determined by the total amount of phase separating material in the system.

If the droplet material can spontaneously transition between two states (e.g., between a phosphorylated state  $P^*$  and a dephosphorylated state  $P$ ) the associated chemical potentials will equilibrate at every point in space ( $\mu_{P^*} = \mu_P$ ). In this case the reaction will change the relative amount of  $P$  and  $P^*$  compared to the passive case, but after this chemical equilibration, the system is passive and no fluxes exist; see Fig. 5B.

Chemical fluxes can be sustained by an external energy input, e.g. by using ATP to phosphorylate  $P$  continuously. Since the metabolism of the cell maintains the chemical potentials of ATP, ADP, and phosphate constant, the conversion  $P \rightleftharpoons P^*$  with and without ATP cannot equilibrate at the same time. However, if these reactions proceed at the same rate everywhere, the phosphorylation driven by ATP will eventually be balanced by the dephosphorylation not involving ATP; see Fig. 5C. Consequently, although ATP is used continuously, there are still no spatial fluxes and

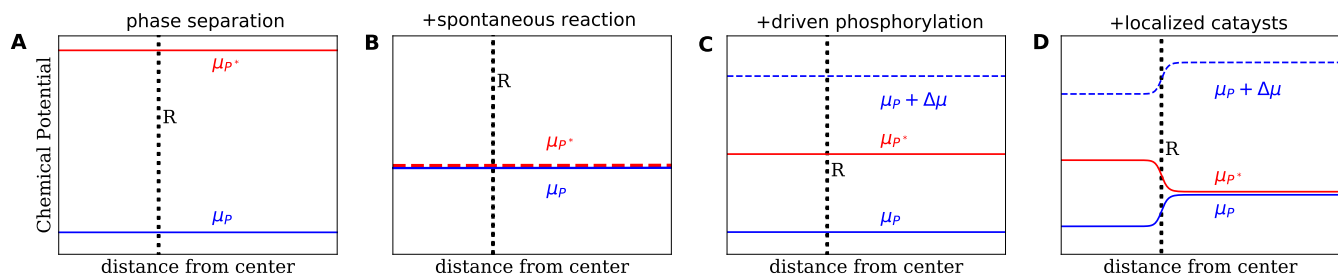

Figure 5: Schematic of the chemical potential of the unphosphorylated protein  $P$  (blue lines) and the phosphorylated protein  $P^*$  (red lines) for different reaction schemes. **A** In the case of passive phase separation, the chemical potentials equilibrate independently. Consequently, gradients in chemical potential are absent and diffusive fluxes do not exist. **B** Adding spontaneous (de-)phosphorylation ( $P \rightleftharpoons P^*$ ) implies the chemical equilibrium  $\mu_P = \mu_{P^*}$ . **C** Additionally driving the phosphorylation by ATP ( $P + \text{ATP} \rightleftharpoons P^* + \text{ADP}$ ) keeps the system away from equilibrium if ATP levels are maintained. However, if the reactions proceed equally in both phases phosphorylation and dephosphorylation can be balanced locally. Consequently, spatial fluxes do not exist although the energy  $\Delta\mu = \mu_{\text{ATP}} - \mu_{\text{ADP}}$  supplied by ATP is consumed. **D** Biasing the reactions, e.g. by localizing kinases and phosphatases in different phases, induces spatial fluxes and allows for size control.

878 the condensates behave qualitatively similar to the passive ones.

879 Kinases and phosphatases act as catalysts for the (de-)phosphorylation reaction, changing the reaction rates but  
 880 not the equilibrium states. However, if the catalysts co-localize with the proteins, the reaction is biased towards  
 881 different states inside and outside the condensate. This local bias leads to a chemical potential difference between the  
 882 condensate and the surrounding, which drives spatial fluxes and can lead to a suppression of coarsening; see Fig. 5D.  
 883 A strong segregation of kinases and phosphatases in different phases leads to strong spatial fluxes and thereby to a  
 884 high conversion efficiency between the two species.
